# Supplementary material for: The impact of the COVID-19 pandemic on cancer care including innovations implemented in Sub-Saharan Africa: A systematic review
Source: PubMed Central journal article supplement (PMC10656081; doi:10.7189/jogh.13.06048), 2023-11-17
Supplement: jogh-13-06048-s001.pdf [file jogh-13-06048-s001.pdf]

**Online Supplementary Document**

**Abunike et al. The Impact of the COVID-19 Pandemic on Cancer care including innovations implemented in Sub-Saharan Africa: A Systematic Review**

**Supplementary Table 1: List of MeSH terms and Keywords**

| <b>MeSH terms</b>            | <b>Keywords</b>    |
|------------------------------|--------------------|
| “COVID-19”                   | SARS-CoV-2         |
| “Africa South of the Sahara” | Coronavirus        |
| “Neoplasms”                  | Subsaharan Africa  |
|                              | Sub-Saharan Africa |
|                              | Cancer             |
|                              | Tumor              |
|                              | Tumour             |
|                              | Malignancy         |
|                              | Malignancies       |
|                              | Carcinoma          |

**Supplementary Table 2: Excel dataset used for Alluvial Chart**

| Author                   | Country       | Cancer type  | Preventive Services | Diagnosis    | Treatment    | Follow up                 |
|--------------------------|---------------|--------------|---------------------|--------------|--------------|---------------------------|
| Abila et al., 2020       | Uganda        | Not reported | Suspended           | Not reported | Delayed      | Delayed<br>Not reported   |
| Chu et al., 2021         | South Africa  | Breast       | Not reported        | Not reported | Delayed      | Not reported              |
| Chu et al., 2021         | South Africa  | Colorectal   | Not reported        | Not reported | No Change    | reported                  |
| Davey et al., 2021       | Botswana      | Gynecologic  | Not reported        | Delayed      | Not reported | NCNP                      |
| Davey et al., 2021       | Botswana      | Gynecologic  | Not reported        | Delayed      | Not reported | SOP<br>Not reported       |
| Benn et al., 2021        | South Africa  | Breast       | Not reported        | Not reported | Delayed      | reported<br>Not reported  |
| Desta et al., 2021       | Ethiopia      | Cervical     | Delayed             | Delayed      | Delayed      | reported<br>Not reported  |
| Ezenwankwo et al., 2021  | Multiple      | Prostate     | Not reported        | Delayed      | Delayed      | reported<br>Not reported  |
| Ezenwankwo et al., 2022  | West Africa   | Prostate     | Suspended           | Delayed      | Delayed      | reported<br>Not reported  |
| Haddison et al., 2022    | Cameroon      | Cervical     | Delayed             | Not reported | Not reported | reported<br>Not reported  |
| Henke., 2021             | Multiple      | Not reported | Suspended           | Delayed      | Delayed      | reported<br>Not reported  |
| Joseph et al., 2022      | Nigeria       | Not reported | Not reported        | Not reported | Delayed      | reported<br>Not reported  |
| Karanja-Chege., 2022     | Kenya         | Cervical     | Suspended           | Not reported | Not reported | reported                  |
| Lombe et al., 2020       | Zambia        | Not reported | Not reported        | Not reported | Delayed      | Delayed<br>Not reported   |
| Martei et al., 2021      | Multiple      | Not reported | Not reported        | Not reported | Delayed      | reported<br>Not reported  |
| Masege et al., 2020      | South Africa  | ENT          | Not reported        | Delayed      | Not reported | reported<br>Not reported  |
| Moustakis et al., 2020   | South Africa  | Not reported | Not reported        | Not reported | Delayed      | reported<br>Not reported  |
| Murewanhema., 2021a      | Zimbabwe      | Cervical     | Suspended           | Not reported | Not reported | reported<br>Not reported  |
| Murewanhema., 2021b      | Zimbabwe      | Cervical     | Not reported        | Not reported | Delayed      | reported                  |
| Murewanhema et al., 2020 | Zimbabwe      | Not reported | Not reported        | Not reported | Suspended    | Suspended<br>Not reported |
| Olabumuyi et al., 2020   | Nigeria       | Not reported | Not reported        | Not reported | Suspended    | reported<br>Not reported  |
| Ramdas et al., 2020      | South Africa  | Breast       | Not reported        | Not reported | No Change    | reported<br>Not reported  |
| Villain et al., 2021     | Rwanda        | Not reported | No Change           | No Change    | No Change    | reported<br>Not reported  |
| Villain et al., 2021     | Cote d'Ivoire | Not reported | No Change           | No Change    | No Change    | reported<br>Not reported  |
| Villain et al., 2021     | Cameroon      | Not reported | Suspended           | No Change    | Suspended    | reported<br>Not reported  |
| Villain et al., 2021     | Zambia        | Not reported | Suspended           | No Change    | No Change    | reported<br>Not reported  |
| Van Wyk et al., 2021     | South Africa  | Breast       | Not reported        | Delayed      | Not reported | reported<br>Not reported  |
| Van Wyk et al., 2021     | South Africa  | Cervical     | Not reported        | Delayed      | Not reported | reported                  |

|                         |              |              |              |              |              |              |
|-------------------------|--------------|--------------|--------------|--------------|--------------|--------------|
| Umutesi et al., 2021    | Rwanda       | Not reported | Suspended    | Suspended    | Suspended    | Not reported |
| Umar et al., 2022       | Kenya        | Not reported | Not reported | Delayed      | Delayed      | Not reported |
| Sormani et al., 2021    | Cameroon     | Cervical     | Suspended    | Not reported | Not reported | Not reported |
| Okunade et al., 2020    | Nigeria      | Gynecologic  | Not reported | Delayed      | Delayed      | Not reported |
| Kugbey et al., 2020     | Ghana        | Not reported | Not reported | Delayed      | Delayed      | Not reported |
| Salako et al., 2020     | Nigeria      | Not reported | Not reported | Not reported | Suspended    | Not reported |
| Vanderpuye et al., 2020 | West Africa  | Not reported | Not reported | Not reported | Suspended    | Not reported |
| Vanderpuye et al., 2020 | South Africa | Not reported | Not reported | Not reported | No Change    | Suspended    |

## Quality Assessment

**Supplementary Table 3: Newcastle - Ottawa Quality Assessment Scale for Cross-Sectional Studies**

| Author                |     | Representativeness of the cases | Sample size | Non-Response rate | Ascertainment of the screening/surveillance tool | Comparability | Assessment of the outcome | Statistical test | Total score (Maximum 10) | Overall Quality Assessment |
|-----------------------|-----|---------------------------------|-------------|-------------------|--------------------------------------------------|---------------|---------------------------|------------------|--------------------------|----------------------------|
| Chu et al, 2020       | SAA | *                               | *           | -                 | -                                                | -             | *                         | *                | 4*                       | Average = 4*<br>Poor       |
|                       | RCR | *                               | *           | -                 | -                                                | -             | *                         | *                | 4*                       |                            |
| Haddison et al, 2022  | SAA | *                               | *           | *                 | *                                                | -             | *                         | *                | 6*                       | Average = 5.5*<br>Fair     |
|                       | RCR | *                               | -           | *                 | *                                                | -             | *                         | *                | 6*                       |                            |
| Irusen et al, 2021    | SAA | *                               | *           | *                 | **                                               | -             | *                         | *                | 7*                       | Average = 6.5*<br>Good     |
|                       | RCR | -                               | *           | *                 | **                                               | -             | *                         | *                | 6*                       |                            |
| Joseph et al, 2022    | SAA | *                               | *           | -                 | *                                                | -             | *                         | *                | 5*                       | Average = 5.5*<br>Fair     |
|                       | RCR | *                               | *           | *                 | *                                                | -             | *                         | *                | 6*                       |                            |
| Martei et al, 2021    | SAA | *                               | -           | -                 | *                                                | -             | *                         | *                | 4*                       | Average = 3.5*<br>Poor     |
|                       | RCR | -                               | -           | -                 | *                                                | -             | *                         | *                | 3*                       |                            |
| Villain et al, 2021   | SAA | *                               | *           | *                 | *                                                | -             | *                         | *                | 6*                       | Average = 5*<br>Fair       |
|                       | RCR | -                               | -           | *                 | *                                                | -             | *                         | *                | 4*                       |                            |
| Umar et al, 2022      | SAA | *                               | *           | *                 | *                                                | -             | *                         | *                | 6*                       | Average = 6*<br>Good       |
|                       | RCR | *                               | *           | *                 | *                                                | -             | *                         | *                | 6*                       |                            |
| Sikakulya et al, 2021 | SAA | *                               | *           | -                 | *                                                | -             | *                         | *                | 5*                       | Average = 5*<br>Fair       |
|                       | RCR | *                               | *           | -                 | *                                                | -             | *                         | *                | 5*                       |                            |

Studies with a total score of 8 points and above were considered to have a low risk of bias; 5 to 7 points were considered to have a medium risk of bias; less than 5 points were considered to have a high risk of bias.



|                  |            |          |          |          |          |          |          |          |          |          |           |           |           |      |
|------------------|------------|----------|----------|----------|----------|----------|----------|----------|----------|----------|-----------|-----------|-----------|------|
|                  | <b>SAA</b> | Y        | Y        | Y        | CD       | NA       | Y        | Y        | CD       | CD       | Y         | N         | CD        | Fair |
|                  | <b>RCR</b> | Y        | Y        | Y        | CD       | NA       | Y        | Y        | CD       | CD       | Y         | CD        | CD        | Fair |
| Diao et al, 2022 |            | <b>1</b> | <b>2</b> | <b>3</b> | <b>4</b> | <b>5</b> | <b>6</b> | <b>7</b> | <b>8</b> | <b>9</b> | <b>10</b> | <b>11</b> | <b>12</b> |      |
|                  | <b>SAA</b> | Y        | CD       | Y        | Y        | N        | Y        | Y        | CD       | Y        | N         | CD        | NA        | Fair |
|                  | <b>RCR</b> | Y        | Y        | Y        | Y        | N        | Y        | Y        | CD       | Y        | CD        | N         | NA        | Good |
| Muli et al, 2021 |            | <b>1</b> | <b>2</b> | <b>3</b> | <b>4</b> | <b>5</b> | <b>6</b> | <b>7</b> | <b>8</b> | <b>9</b> | <b>10</b> | <b>11</b> | <b>12</b> |      |
|                  | <b>SAA</b> | Y        | Y        | Y        | Y        | Y        | Y        | Y        | N        | CD       | N         | N         | N         | Good |
|                  | <b>RCR</b> | Y        | Y        | Y        | Y        | Y        | Y        | Y        | N        | CD       | N         | N         | N         | Good |

**Refer to the table below for the criteria**

| <b>Criteria</b>                                                                                                                                                       | <b>Scale Items</b> |
|-----------------------------------------------------------------------------------------------------------------------------------------------------------------------|--------------------|
| Was the study question or objective clearly stated?                                                                                                                   | 1                  |
| Were eligibility/selection criteria for the study population pre-specified and clearly described?                                                                     | 2                  |
| Were the participants in the study representative of those who would be eligible for the test/service/intervention in the general or clinical population of interest? | 3                  |
| Were all eligible participants that met the pre-specified entry criteria enrolled?                                                                                    | 4                  |
| Was the sample size sufficiently large to provide confidence in the findings?                                                                                         | 5                  |
| Was the test/service/intervention clearly described and delivered consistently across the study population?                                                           | 6                  |
| Were the outcome measures pre-specified, clearly defined, valid, reliable, and assessed consistently across all study participants?                                   | 7                  |
| Were the people assessing the outcomes blinded to the participants' exposures/interventions?                                                                          | 8                  |
| Was the loss to follow-up after baseline 20% or less? Were those lost to follow-up accounted for in the analysis?                                                     | 9                  |

|                                                                                                                                                                                                                                                                                                           |    |
|-----------------------------------------------------------------------------------------------------------------------------------------------------------------------------------------------------------------------------------------------------------------------------------------------------------|----|
| Did the statistical methods examine changes in outcome measures from before to after the intervention? Were statistical tests done that provided p values for the pre-to-post changes?                                                                                                                    | 10 |
| Were outcome measures of interest taken multiple times before the intervention and multiple times after the intervention (i.e., did they use an interrupted time-series design)?                                                                                                                          | 11 |
| If the intervention was conducted at a group level (e.g., a whole hospital, a community, etc.) did the statistical analysis take into account the use of individual-level data to determine effects at the group level?<br><br>*If this question is not applicable, the total score is out of 11, not 12. | 12 |

Key: Y = Yes, N = No, NR = Not reported, CD = Cannot determine, NA = Not applicable

**Supplementary Table 6: Quality Assessment for Perspective, Descriptive, and Retrospective Studies**

| Article            | SAA comments                                                                                                         | RCR comments                                                                                                 | Conflict of interest (Noted) |
|--------------------|----------------------------------------------------------------------------------------------------------------------|--------------------------------------------------------------------------------------------------------------|------------------------------|
| Abila et al, 2020  | This expert opinion is subjective and prone to informational bias. May have limited scope and poor generalizability. | Expert opinion only reflects the opinion(s) of the author; therefore, generalizations may not be conclusive. | No COI cited                 |
| Bhutta et al, 2021 | This descriptive study has a limited scope and cannot be generalized to other settings                               | A descriptive study that conducted in a single area, generalizations may be impacted.                        | No COI cited                 |
| Chu et al, 2021    | In this retrospective study, poorly stored data can affect the quality of results.                                   | A retrospective study whose results and conclusions may be impacted by poor data storage. Study              | No COI cited                 |

|                          |                                                                                                                                                                       |                                                                                                                                                   |                                                                                                                                                                                                                                                                                                              |
|--------------------------|-----------------------------------------------------------------------------------------------------------------------------------------------------------------------|---------------------------------------------------------------------------------------------------------------------------------------------------|--------------------------------------------------------------------------------------------------------------------------------------------------------------------------------------------------------------------------------------------------------------------------------------------------------------|
|                          | Findings may not be generalizable.                                                                                                                                    | conducted in one site limiting generalizability.                                                                                                  |                                                                                                                                                                                                                                                                                                              |
| Davey et al, 2021        | This descriptive study is prone to lack of generalizability, with limited scope.                                                                                      | A descriptive study that could be prone to subjective bias and generalizability is limited.                                                       | 6 <sup>th</sup> author:<br>Roche/Genentech, Novartis, MSD, Bristol-Myers Squibb, Pfizer, Mundifarma, AstraZeneca.<br>8 <sup>th</sup> author:<br>Pfizer, MSD, Mafemi PTY LTD, VIA Global Health                                                                                                               |
| Benn et al, 2021         | A letter to the editor is subjective and prone to informational bias.                                                                                                 | A letter to the editor reflects the opinion(s) of the author, therefore prone to subjective and informational bias with limited generalizability. | BLR reports personal fees, advisory boards, and speaker engagements from Novartis South Africa. Personal fees, advisory boards, and speaker engagements from Elli-Lilly South Africa. Personal fees, advisory boards, and speaker engagements from AstraZeneca South Africa during the conduct of the study. |
| Ezenwankwo & Nnaji, 2021 | A descriptive study that is prone to informational bias, is subjective and non-generalizable. Reflecting mostly the author's opinions within a specific context only. | Prone to subjectivity and reflects only the opinion(s) of the authors.                                                                            | No COI cited                                                                                                                                                                                                                                                                                                 |
| Ezenwankwo et al, 2022   | This perspective piece is prone to subjectivity and the findings cannot be generalized to other contexts.                                                             | Prone to subjectivity and reflects only the opinion(s) of the authors.                                                                            | No COI cited                                                                                                                                                                                                                                                                                                 |
| Henke, 2021              | This letter to the editor reflects the author's opinions within a particular context, therefore, the reports may not be generalizable and prone to subjective bias.   | Limited to the opinions of the author. Lacks rigor and cannot be generalized.                                                                     | No COI cited                                                                                                                                                                                                                                                                                                 |



|                       |                                                                                                                                                |                                                                                                                       |                                                                                         |
|-----------------------|------------------------------------------------------------------------------------------------------------------------------------------------|-----------------------------------------------------------------------------------------------------------------------|-----------------------------------------------------------------------------------------|
| Karanja-Chege, 2022   | This review provides a description within a specific context. This impacts generalization and is subjected to biases.                          | Captures events within a specific context. It has limited generalizability.                                           | No COI cited                                                                            |
| Lombe et al, 2020     | The article provides a description of services in one country. Findings are non-generalizable, and the author's opinions could be subjective.  | Findings are limited to one setting, this impacts generalization of findings.                                         | No COI cited                                                                            |
| Masege et al, 2020    | Description is limited to one facility, in one country. This may not be generalizable. Poor record keeping could impact results.               | Findings are limited to one facility in a single country. Results may not be extrapolated to other settings.          | No COI cited                                                                            |
| Moustakis et al, 2020 | This retrospective study may be affected by inadequate record-keeping. Records were obtained from one facility which impacts generalizability. | Prone to selection bias while choosing sample. Poor record keeping can impact quality of results and findings.        | No COI cited                                                                            |
| Murewanhema, 2021     | This perspective study may be subjective and prone to informational bias, with limited generalizability                                        | Limited to the opinions of the author therefore, findings may not be reflective of the experiences in other settings. | No COI cited                                                                            |
| Murewanhema, 2021     | This perspective and recommendation article has limited generalizability. The contexts of the report are limited to one setting.               | Limited to the opinions of the author therefore, findings may not be reflective of the experiences in other settings. |                                                                                         |
| Murewanhema, 2020     | This perspective and recommendation article has limited generalizability. The contexts of the report are limited to one setting.               | Limited to the opinions of the author therefore, findings may not be reflective of the experiences in other settings. | No COI cited                                                                            |
| Ngwa et al, 2022      | The findings reported may be generalizable to many settings within SSA. Informational                                                          | Involved experts from different SSA countries. Therefore, there is a decrease in                                      | JD and KG received grants or contracts from Takeda Pharmaceutical, Johnson and Johnson, |

|                              |                                                                                                                                                |                                                                                                                                        |                                                                                                                                                                                                                                                                                                                                                                                                                                                                                                                                                                                                                                                                                                                                                                                                    |
|------------------------------|------------------------------------------------------------------------------------------------------------------------------------------------|----------------------------------------------------------------------------------------------------------------------------------------|----------------------------------------------------------------------------------------------------------------------------------------------------------------------------------------------------------------------------------------------------------------------------------------------------------------------------------------------------------------------------------------------------------------------------------------------------------------------------------------------------------------------------------------------------------------------------------------------------------------------------------------------------------------------------------------------------------------------------------------------------------------------------------------------------|
|                              | <p>bias may be minimal as the commission responsible for the study was made up of experts from different SSA countries.</p>                    | <p>informational bias. Also, the findings are reflective of experiences of more than one country.</p>                                  | <p>AstraZeneca, Cepheid, Merck, and Pfizer as funding for specific cancer projects. JG has served as the previous chair of the South African National Advisory Committee on Cancer Control</p> <p>OWB received a P30 National Cancer Institute cancer grant to Johns Hopkins University. And has had a leadership or fiduciary role paid or unpaid at Lyell Immunopharma, PDS Biotech, and Grail. Also has stock or stock options with Lyell Immunopharma and PDS Biotech.</p> <p>AR received the Schneider-Lesser award as a junior faculty grant</p> <p>TRR served as principal investigator on grants from the National Cancer Institute including P20 CA233255, R01CA207365, and U01CA184374. And received consulting fees from serving on 13 US cancer center scientific advisory boards.</p> |
| <p>Olabumuyi et al, 2020</p> | <p>Expert opinions may be biased by the limitations of the expert. Also, experts may be biased to elaborate their belief systems which may</p> | <p>Expert opinions are not rigorous. It reflects only the opinions of the experts which may differ from one individual to another.</p> | <p>No COI cited</p>                                                                                                                                                                                                                                                                                                                                                                                                                                                                                                                                                                                                                                                                                                                                                                                |

|                      |                                                                                                                                                                           |                                                                                                                                       |                                                                                                              |
|----------------------|---------------------------------------------------------------------------------------------------------------------------------------------------------------------------|---------------------------------------------------------------------------------------------------------------------------------------|--------------------------------------------------------------------------------------------------------------|
|                      | differ from existing trends.                                                                                                                                              |                                                                                                                                       |                                                                                                              |
| Osibogun et al, 2021 | The results of this retrospective study could be impacted by poor record keeping. Records were obtained from one setting which impacts generalizability.                  | Prone to selection bias. Also, incomplete data collection and poor record keeping can impact quality of result.                       | No COI cited                                                                                                 |
| Ramdas et al, 2020   | With retrospective studies, certain important details could be missed from the medical record. Data is collected from a single setting which can impact generalizability. | Incomplete data impacts quality of findings. Also, samples are drawn from a single setting, this limits generalizability of findings. | YR: Consulting or advisory role with Norvatis<br><br>MVH: Employment with Netcare.<br><br>No other COI cited |
| Salcedo et al, 2021  | Descriptive review is limited to a single setting. Generalizability can be impacted.                                                                                      | Description of experiences in a single setting. Findings cannot be generalized.                                                       | No COI cited                                                                                                 |
| Weber et al, 2021    | The authors described the outcome of an intervention. It is prone to a lack of generalizability since the intervention occurred in one center.                            | Intervention carried out in a single setting. The outcomes may not be achieved in other settings.                                     | No COI cited                                                                                                 |
| Van Wyk et al, 2021  | This retrospective analysis is prone to errors if medical records were collected and stored properly. Also lacks generalizability.                                        | Incomplete data impacts quality of findings. Also, samples are drawn from a single setting, this limits generalizability of findings. | No COI cited                                                                                                 |
| Umutesi et al, 2021  | This descriptive review is limited to one setting, which impacts generalizability. Also, subject to the author's opinions and experiences.                                | Reflects opinions of the authors therefor prone to subjective bias. Lacks rigor and findings may not be generalizable.                | No COI cited                                                                                                 |
| Sumbana et al, 2020  | This descriptive review is limited to one setting, which impacts generalizability. Also, subject to the author's opinions and experiences.                                | Provides summary of experiences in a single setting. Prone to subjective and informational bias.                                      | No COI cited                                                                                                 |

|                      |                                                                                                                                                                                                  |                                                                                                                             |              |
|----------------------|--------------------------------------------------------------------------------------------------------------------------------------------------------------------------------------------------|-----------------------------------------------------------------------------------------------------------------------------|--------------|
| Sormani et al, 2021  | This descriptive review provides only a summary of the authors' experiences. Causal relationships cannot be established, and generalizability is limited.                                        | Provides summary of experiences in a single setting. Prone to subjective and informational bias.                            |              |
| Okunade et al, 2020  | This perspective and recommendation reflect the opinions of the authors which may be subjective and prone to informational bias. The recommendations may not be generalizable to other settings. | Reflects the opinions of the authors. The recommendations may only apply to a single setting with limited generalizability. | No COI cited |
| Selgado et al, 2021  | Retrospective analysis is prone to errors if data collection is inadequate. Causal relationships are not readily established, and findings have limited generalizability.                        | Data collected from one setting; this impacts generalizability. Also, incomplete data impacts quality of findings.          | No COI cited |
| Rosa et al, 2021     | Descriptive study limited to a single setting, prone to informational bias and limited generalizability.                                                                                         | Prone to informational and subjective biases. Limited generalizability.                                                     | No COI cited |
| Kugbey et al, 2020   | This descriptive study has limited generalizability as findings were obtained from one setting. Also, the findings may be subjective to authors' opinions and prone to informational bias.       | Prone to informational and subjective biases. Limited generalizability.                                                     | No COI cited |
| Kassaman et al, 2020 | This descriptive review is limited to one setting, which impacts generalizability. Also, subject to the author's opinions and experiences.                                                       | Prone to informational and subjective biases. Limited generalizability.                                                     | No COI cited |
| Salako et al, 2020   | The article provides a description of services in one country. Findings are non-                                                                                                                 | Findings from a single setting which impacts generalizability. Prone to informational bias.                                 | No COI cited |

|                        |                                                                                                                                                                                     |                                                                                                                           |              |
|------------------------|-------------------------------------------------------------------------------------------------------------------------------------------------------------------------------------|---------------------------------------------------------------------------------------------------------------------------|--------------|
|                        | generalizable, and the author's opinions could be subjective.                                                                                                                       |                                                                                                                           |              |
| Okeke et al, 2020      | This perspective article may have wider generalizability. The context of the report explores more than one setting but may be based on the opinions and experiences of the authors. | Reflects the opinions and experiences of the authors, increasing subjective and informational biases.                     | No COI cited |
| Vanderpuye et al, 2020 | The perspective piece reflects the experiences and opinions of the authors. Therefore, findings may not be generalizable.                                                           | The perspective piece reflects the experiences and opinions of the authors. Therefore, findings may not be generalizable. | No COI cited |
